# Supplementary material
Source: PubMed Central journal article supplement (PMC4818254)
Supplement: 15_056_Hu_Suppl.pdf [file 15_056_Hu_Suppl.pdf]

Supplemental Data

**Aloperine Protects Mice against Ischemia-Reperfusion (IR)-Induced Renal Injury by Regulating PI3K/AKT/mTOR Signaling and AP-1 Activity**

Shuang Hu,<sup>1\*</sup> Yuxing Zhang,<sup>1\*</sup> Meng Zhang,<sup>1</sup> Yanchao Guo,<sup>1</sup> Ping Yang,<sup>1</sup> Shu Zhang,<sup>1</sup> Sakine Simsekylmaz,<sup>1</sup> Jun-Fa Xu,<sup>2</sup> Jinxiu Li,<sup>3</sup> Xudong Xiang,<sup>3</sup> Qilin Yu,<sup>1</sup> and Cong-Yi Wang<sup>1,2,3</sup>

Online address: <http://www.molmed.org>

The Feinstein Institute for Medical Research North Shore LIJ  
Empowering Imagination. Pioneering Discovery.®

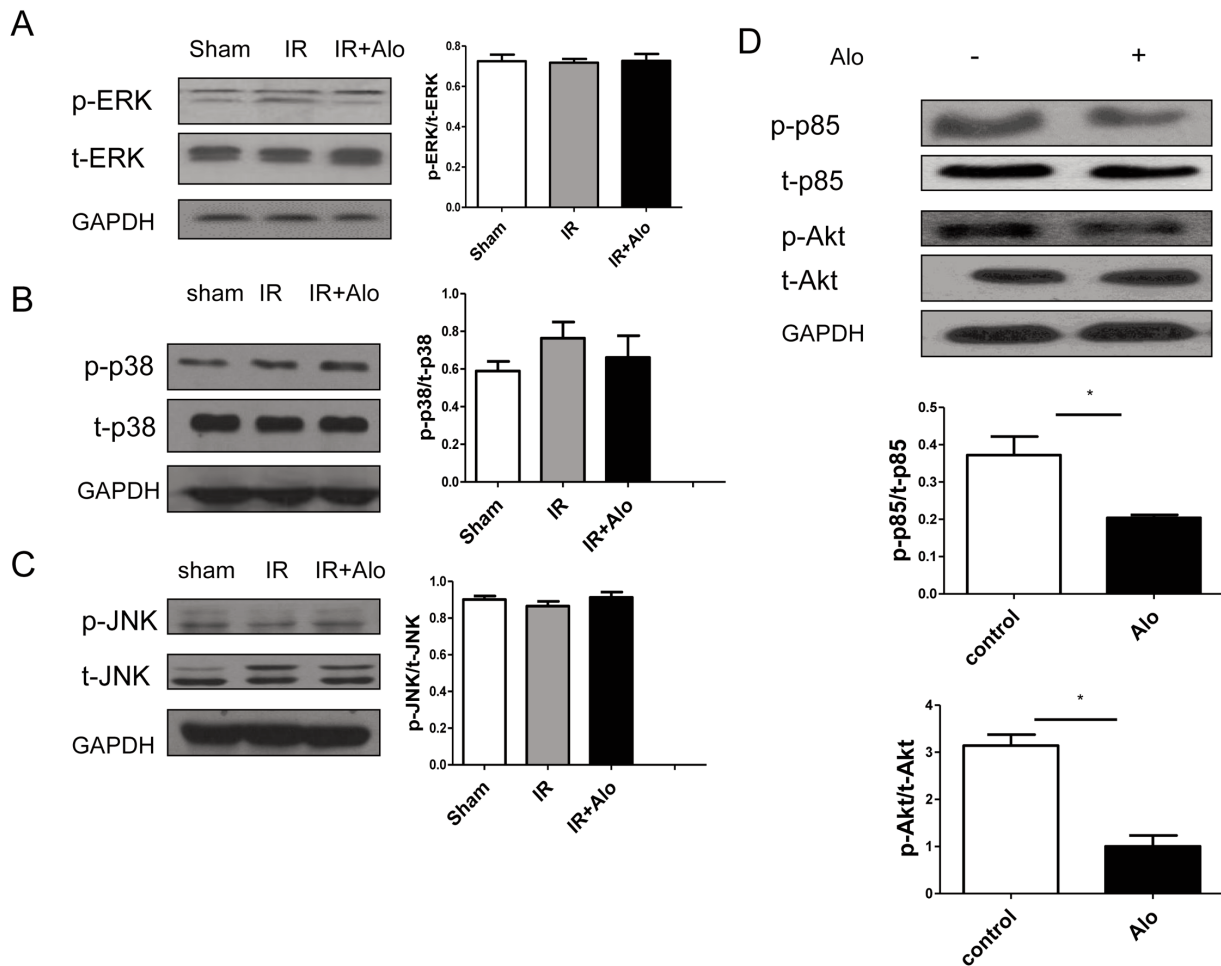

**Supplementary Figure S1.** Aloperine does not affect the activation of MAP kinases ERK1/2, p38 and JNK. Western blot analysis of renal lysates prepared following 24 h IR insult for total and phosphorylated ERK1/2 (A), p38 (B), and JNK (C), and treatment of RAW264.7 cells with aloperine attenuated hypoxia-induced PI3Kp85 and Akt activation as well (D). \*, Similar results were obtained in mice after 6 and 12 h of IR insult. *P* < 0.05; \*\*, *P* < 0.01; and \*\*\*, *P* < 0.001.
